# Supplementary material
Source: publisher site journal article supplement (https://www.dovepress.com/article/245078)
Supplement: Supplementary file 1 [file get_supplementary_file.php]

**Table S1. Functional connectivity strength in the MDD and NC groups.**

| DMN areas | FCintra | |  | FCinter | |
| --- | --- | --- | --- | --- | --- |
|  | MDD | HC |  | MDD | HC |
| L MFG | 0.49 ± 0.03 | 0.56 ± 0.03 |  | 0.43 ± 0.03 | 0.48 ± 0.03 |
| R MFG | 0.51 ± 0.03 | 0.54 ± 0.03 |  | 0.45 ± 0.03 | 0.45 ± 0.04 |
| L oMFG | 0.42 ± 0.03 | 0.48 ± 0.03 |  | 0.39 ± 0.02 | 0.44 ± 0.03 |
| R oMFG | 0.40 ± 0.02 | 0.42 ± 0.03 |  | 0.40 ± 0.02 | 0.38 ± 0.03 |
| L mSFG | 0.55 ± 0.02 | 0.64 ± 0.02 |  | 0.50 ± 0.02 | 0.56 ± 0.03 |
| R mSFG | 0.51 ± 0.03 | 0.57 ± 0.03 |  | 0.55 ± 0.03 | 0.62 ± 0.03 |
| L mOFG | 0.49 ± 0.02 | 0.61 ± 0.02 |  | 0.49 ± 0.02 | 0.57 ± 0.02 |
| R mOFG | 0.46 ± 0.02 | 0.53 ± 0.03 |  | 0.51 ± 0.02 | 0.58 ± 0.03 |
| L ACG | 0.39 ± 0.02 | 0.47 ± 0.03 |  | 0.44 ± 0.02 | 0.52 ± 0.03 |
| R ACG | 0.40 ± 0.02 | 0.46 ± 0.03 |  | 0.46 ± 0.02 | 0.49 ± 0.03 |
| L PCG | 0.43 ± 0.02 | 0.57 ± 0.02 |  | 0.45 ± 0.02 | 0.55 ± 0.02 |
| R PCG | 0.39 ± 0.02 | 0.51 ± 0.02 |  | 0.43 ± 0.03 | 0.56 ± 0.02 |
| L HP | 0.37 ± 0.03 | 0.40 ± 0.02 |  | 0.35 ± 0.02 | 0.37 ± 0.02 |
| R HP | 0.35 ± 0.02 | 0.40 ± 0.02 |  | 0.34 ± 0.02 | 0.41 ± 0.02 |
| L PHG | 0.44 ± 0.03 | 0.52 ± 0.02 |  | 0.44 ± 0.03 | 0.49 ± 0.02 |
| R PHG | 0.44 ± 0.03 | 0.48 ± 0.02 |  | 0.43 ± 0.03 | 0.51 ± 0.02 |
| L IPL | 0.42 ± 0.03 | 0.46 ± 0.03 |  | 0.42 ± 0.03 | 0.43 ± 0.03 |
| R IPL | 0.43 ± 0.02 | 0.45 ± 0.02 |  | 0.36 ± 0.02 | 0.38 ± 0.02 |
| L SMG | 0.34 ± 0.03 | 0.35 ± 0.03 |  | 0.37 ± 0.03 | 0.39 ± 0.03 |
| R SMG | 0.34 ± 0.03 | 0.37 ± 0.02 |  | 0.35 ± 0.02 | 0.38 ± 0.02 |
| L AG | 0.52 ± 0.02 | 0.59 ± 0.02 |  | 0.45 ± 0.02 | 0.48 ± 0.02 |
| R AG | 0.53 ± 0.02 | 0.54 ± 0.02 |  | 0.47 ± 0.02 | 0.49 ± 0.03 |
| L PC | 0.48 ± 0.03 | 0.59 ± 0.02 |  | 0.54 ± 0.03 | 0.60 ± 0.03 |
| R PC | 0.49 ± 0.03 | 0.54 ± 0.03 |  | 0.49 ± 0.03 | 0.58 ± 0.03 |
| L MTG | 0.52 ± 0.03 | 0.62 ± 0.02 |  | 0.52 ± 0.03 | 0.57 ± 0.03 |
| R MTG | 0.52 ± 0.03 | 0.58 ± 0.03 |  | 0.51 ± 0.03 | 0.58 ± 0.03 |
| L MTP | 0.47 ± 0.03 | 0.56 ± 0.03 |  | 0.45 ± 0.03 | 0.51 ± 0.03 |
| R MTP | 0.45 ± 0.03 | 0.52 ± 0.03 |  | 0.49 ± 0.03 | 0.57 ± 0.02 |

Continuous variables are expressed as mean ± SEM.

Abbreviations: ACG, anterior cingulate gyrus; AG, angular gyrus; DMN, default mode network; FC, functional connectivity; HP, hippocampus; IPL, inferior parietal lobule; MFG, middle frontal gyrus; mOFG, medial orbitofrontal gyrus; mSFG, medial superior frontal gyrus; MTG, middle temporal gyrus; MTP, middle temporal pole; oMFG, orbital part middle frontal gyrus; PC, precuneus; PCG, posterior cingulate gyrus; PHG, parahippocampal gyrus; SMG, supramarginal gyrus.
